# Supplementary material
Source: MDPI journal article supplement (https://www.mdpi.com/2073-445X/13/2/178)
Supplement: s1 [file s1]

**Supplementary Table S1.** Substrate temperature data (substrate monthly mean temperature (°C), annual mean temperature (°C), maximum annual temperature (°C), and minimum annual temperature (°C)) for all Data Loggers operating in 2019.

|               | April | May   | June  | July  | August | September | October | Average Temp | Max Temp     | Min Temp     |
|---------------|-------|-------|-------|-------|--------|-----------|---------|--------------|--------------|--------------|
| <b>AG1</b>    | 15.58 | 13.69 | 21.92 | 24.75 | 23.85  | 21.05     | 10.81   | <b>15.08</b> | <b>34.02</b> | <b>2.92</b>  |
| <b>AG2</b>    | 21.46 | 21.59 | 20.85 | 22.59 | 23.80  | 22.25     | 12.37   | <b>18.99</b> | <b>30.16</b> | <b>2.62</b>  |
| <b>AG3</b>    | 13.97 | 12.93 | 18.16 | 22.58 | 22.51  | 19.69     | 10.04   | <b>17.13</b> | <b>30.93</b> | <b>3.04</b>  |
| <b>AG4</b>    | 12.31 | 11.80 | 17.60 | 21.45 | 21.04  | 17.92     | 9.32    | <b>15.92</b> | <b>25.82</b> | <b>6.65</b>  |
| <b>AG5</b>    | 14.90 | 13.32 | 19.01 | 22.52 | 21.95  | 18.35     | 8.74    | <b>16.97</b> | <b>29.21</b> | <b>3.04</b>  |
| <b>GR1</b>    | 19.53 | 15.66 | 22.99 | 27.53 | 25.86  | 23.30     | 10.39   | <b>20.75</b> | <b>43.88</b> | <b>-0.22</b> |
| <b>GR2</b>    | 19.24 | 14.78 | 22.31 | 27.41 | 26.01  | 21.42     | 9.47    | <b>20.09</b> | <b>38.09</b> | <b>0.60</b>  |
| <b>AG AVG</b> | 15.65 | 14.67 | 19.51 | 22.78 | 22.63  | 19.85     | 10.26   | <b>16.82</b> | <b>30.03</b> | <b>3.65</b>  |
| <b>GR AVG</b> | 19.39 | 15.22 | 22.65 | 27.47 | 25.93  | 22.36     | 9.93    | <b>20.42</b> | <b>40.99</b> | <b>0.19</b>  |

**Supplementary Table S2.** Substrate temperature data (substrate monthly mean temperature (°C), annual mean temperature (°C), maximum annual temperature (°C), and minimum annual temperature (°C)) for all Data Loggers operating in 2020.

|               | April | May    | June  | July  | August | September | October | Average Temp | Max Temp | Min Temp |
|---------------|-------|--------|-------|-------|--------|-----------|---------|--------------|----------|----------|
| <b>AG1</b>    | 13.30 | 20.62  | 22.46 | 24.05 | 24.59  | 19.54     | 15.85   | 20.06        | 33.29    | 2.53     |
| <b>AG2</b>    | N/A   | N/A    | N/A   | N/A   | N/A    | N/A       | N/A     | N/A          | N/A      | N/A      |
| <b>AG3</b>    | 10.47 | 15.82  | 18.75 | 20.61 | 21.16  | 17.41     | 11.50   | 16.53        | 25.87    | 3.17     |
| <b>AG4</b>    | 9.11  | 12.97  | 17.84 | 21.08 | 20.80  | 17.81     | 9.32    | 15.56        | 27.54    | 3.30     |
| <b>AG5</b>    | 10.90 | 16.30  | 18.23 | 22.27 | 22.01  | 16.95     | 9.38    | 16.58        | 26.81    | 2.01     |
| <b>AG6</b>    | 9.69  | 15.01  | 18.49 | 20.99 | 21.25  | 16.55     | 10.72   | 16.10        | 25.69    | 3.30     |
| <b>GR1</b>    | 15.20 | 21.58  | 23.60 | 25.22 | 25.86  | 18.90     | N/A     | 21.73        | 35.09    | 0.94     |
| <b>GR2</b>    | N/A   | N/A    | N/A   | N/A   | N/A    | N/A       | N/A     | N/A          | N/A      | N/A      |
| <b>GR3</b>    | 15.69 | 20.54  | 23.82 | 26.41 | 26.63  | 18.77     | 11.33   | 20.46        | 36.72    | 0.51     |
| <b>GR4</b>    | 15.98 | 20.73  | 24.08 | 25.99 | 25.36  | 17.30     | 9.11    | 19.79        | 35.86    | 0.38     |
| <b>GR5</b>    | 12.62 | 20.78  | 23.83 | 25.62 | 24.92  | 18.21     | 11.13   | 19.59        | 39.51    | 0.86     |
| <b>GR6</b>    | N/A   | -17.78 | 22.42 | 23.01 | 22.18  | 17.64     | 12.58   | 19.57        | 37.36    | 2.92     |
| <b>AG AVG</b> | 10.69 | 16.15  | 19.15 | 21.80 | 21.96  | 17.65     | 11.35   | 16.97        | 27.84    | 2.86     |
| <b>GR AVG</b> | 14.87 | 20.91  | 23.55 | 25.25 | 24.99  | 18.17     | 11.04   | 20.23        | 36.91    | 1.12     |

**Supplementary Table S3.** Mean monthly average temperatures (°C), mean monthly maximum temperatures (°C), and precipitation (mm) [36] at DBG in 2019 and 2020 over the course of the study.

|        | Year | Jan   | Feb   | Mar   | Apr   | May   | Jun   | Jul   | Aug   | Sep   | Oct   | Nov   | Dec   | Annual |
|--------|------|-------|-------|-------|-------|-------|-------|-------|-------|-------|-------|-------|-------|--------|
| Mean   | 2019 | 0.00  | -2.06 | 1.72  | 9.50  | 10.89 | 18.67 | 24.28 | 24.11 | 20.72 | 6.50  | 2.33  | 0.94  | 9.78   |
|        | 2020 | 1.44  | -2.17 | 5.83  | 7.94  | 15.33 | 21.72 | 24.72 | 25.00 | 18.56 | 9.89  | 6.50  | 0.61  | 11.28  |
| Max    | 2019 | 7.00  | 5.17  | 8.17  | 17.06 | 17.72 | 26.72 | 32.83 | 32.50 | 29.72 | 14.72 | 9.83  | 7.39  | 17.39  |
|        | 2020 | 8.89  | 4.39  | 13.33 | 16.17 | 23.89 | 30.94 | 33.56 | 34.17 | 27.06 | 19.06 | 14.83 | 7.50  | 19.50  |
| Precip | 2019 | 45.47 | 24.64 | 42.16 | 4.83  | 61.98 | 3.81  | 40.64 | 32.00 | 4.06  | 40.64 | 33.53 | 10.41 | 344.17 |
|        | 2020 | 1.78  | 34.04 | 57.66 | 24.64 | 15.49 | 41.40 | 15.75 | 3.56  | 24.64 | 10.67 | 18.54 | 14.99 | 263.14 |
